# Supplementary material
Source: publisher figshare collection journal article supplement (https://tandf.figshare.com/articles/dataset/_/7037687)
Supplement: Supplementary file 1 [file 1]

Archive with 2 entries (2 files):
- Code Implementing LP Solvers.zip
- Revised Supplementary Materials JASA-T&M-2013-0185.pdf
